# Supplementary material for: Mapping Local Community Food Organisation Systems: Exploring Organisational Relationships and Key Dependencies
Source: Research Square preprint supplement (doi:10.21203/rs.3.rs-8231779/v1), 2025-12-22
Supplement: Supplementary file 1 [file 50963fe0127a7c71dfebbd0f.docx]

| Confirmatory workshop plan | |
| --- | --- |
| Topic | Co-constructing a typology and glossary of community food assets in Bradford |
| Output | Feedback on CFO systems map |
| Roles | Chair  Co-chair/Facilitator |
| Total session time | 90 minutes |
| Resources | Venue materials: Access to a computer and the internet for participants.  Documents:   - Workshop slides - Link to live systems map |
| Timing | Actions |
| Welcome (staff introductions), agenda and project overview/recap | Chair: (example script)   - Thanks for coming and introductions - Purpose: review and amend systems map, will also feed into typology - Ground rules: confidential, respectful of each other, giving others time to speak. - Recording the meeting - Short introductions (participant) - name and organisation - Agenda - Background to the project   - Funded by NIHR   - Part of larger programme of work   - WP1: systems mapping - understanding what exists, how it works, and how organisations and key players work together   - What we have done already - survey, workshops with service providers and users, interviews   - What we will do after today     - Amend the map     - Workshop in tower hamlets and nationally     - Final amends and outputs |
| Activity  Review of systems map | Chair/facilitator:   - Ask participants (as a group):   - What do you think of the systems map/ an individual component?   - What would you change?   - What is missing? |
| Closing session and next steps | MP:   - Thank you, next steps - Follow up email with changes - Further stages of research, immediate and longer term - We will keep in touch and look out for findings (dissemination support) |
