# Supplementary material for: Mapping Local Community Food Organisation Systems: Exploring Organisational Relationships and Key Dependencies
Source: Research Square preprint supplement (doi:10.21203/rs.3.rs-8231779/v1), 2025-12-22
Supplement: Supplementary file 2 [file c2ad2d07f77f1d4a59c89db6.docx]

| **CFO representative workshop plan (exploratory)** | |
| --- | --- |
| **Topic** | Services and organisations supporting people in food poverty in Bradford/Tower Hamlets |
| **Output** | CFO system maps for Bradford or Tower Hamlets |
| **Roles** | Chair to lead session and assign breakout groups  One facilitator per group (aid discussions/activities and take notes where possible).  One person to keep a note of timings/alert chair & facilitators/record whole group feedback session |
| **Total session time** | 180 minutes / 3 hours (including breaks) |
| **Resources** | Rich Picture examples (chairs may use others)   - [Rich pictures - OpenLearn - Open University](https://www.open.edu/openlearn/science-maths-technology/engineering-technology/rich-pictures). - Rich Picture example PPT slides   Toolkit for civil servants (summarising Rich Pictures and other approaches) – background document for staff:   - [An introductory systems thinking toolkit for civil servants - GOV.UK](https://www.gov.uk/government/publications/systems-thinking-for-civil-servants/toolkit).   Venue materials: Flipchart paper for group work and pens.  Workshop slides to be projected (see workshop slides PPT). |
| **Timing** | **Actions** |
| **Welcome and agenda**  **5 minutes** | **Chair:** (example script)   - “Thank you all for joining us today in a workshop which aims to learn more about food support and related services in Bradford. - Introduce team - **Present the agenda for the workshop - see Agenda slide.** |
| **Workshop and Activity 1 introduction**  **15 minutes**  Led by chair  Rich Picture activity explanation | **Chair:**  (example script)   - We want to learn from you about the support available to people in food poverty in xxx - for instance, what organisations and services exist, what they do and how they work together. - This workshop is part of a larger programme of work that we are doing over the next two years in Bradford and Tower Hamlets in East London, to better understand what support is available to help people in food poverty. It is funded by the National Institute for Health Research (NIHR) and it is called Fair Food Futures UK. - In this room today we have a range of people working in some way to support people in food poverty - or indeed just poverty. We hope this workshop will be an opportunity to discuss your insights and experiences with us and each other, and together build an understanding of the support available for people in food poverty in xxx. - The workshop is split into two halves. In the first half we will work together in small groups to build something called a ‘Rich Picture’, setting out all the different types of support that are available. In the second half, we will work together in the same small groups to explore links and relationships between organisations and services responding to food poverty. - You are the experts here. We want to learn from you about what is going on in xxx. Together, we want to produce what we call a ‘rich picture’ of all the services that are available and how they work together.   **Rich Picture specifics/stages**   - We have a lot to get through so I am now going to introduce the first activity – building a Rich Picture. Don’t worry if it seems complicated at first, it is really very simple. Essentially it is a way for you as a group to get everything going on around food poverty in xxx down on a single sheet of paper. - We will ask you to work in small groups to think about all of the different activities and services helping people in food poverty in xxx. - To help you in your activity, I am going to talk you through the stages of creating a Rich Picture, and give some examples. - **Show Rich Picture example…[e.g. above examples?]…** - Description of Rich Picture method – a way of representing things in a complex, messy situation (e.g. responses to food poverty). Suggest some key steps, e.g.   - Group discussion on local level support available.   - Alongside this or afterwards – represent these on the sheets of paper through any visual means and/or text, e.g., pictures, symbols, cartoons, sketches, keywords.   - Don’t think too much about relationships between organisations or placement of drawings at this stage (this is activity 2). - *A good way to start is to begin thinking now about what local level support is available to help people in food poverty in xxx, and what work your organisation is doing in this area.* - Emphasise participation, group discussion, no ‘wrong’ answers, no artistic ability needed. Disagreement is fine (represent different views on the Rich Picture). Also, not to think too much about the placement of text/drawings on the sheets of paper. - …[refer to the example to explain – and check the room for understanding of the RP method/any questions]…   **Timings/feedback**   - “You will have one hour to work together to come up with a Rich Picture in your groups. Your facilitator will help to keep you on track and will be there to answer any questions, and may be taking some notes as well. - At the end of the activity there will be a 15 minute coffee break, after which we will return to the main group to review the activity and one person from each group will feed back to the room, before moving onto the second activity. Please think about which person from your group will feed back to the main session. - Before we start, I just need to remind you that we will be recording the feedback sessions (not the group work) to allow us to take notes afterwards. The recording will be deleted once we have taken our notes. I’ll give you all some time now if you would like to withdraw consent – pause and then proceed. - Are there any immediate questions about the activity? The facilitators can also answer questions.”   **Chair:** To allocate groups of 5/6 participants (depending on overall workshop size). |
| **Activity 1**  Developing a Rich Picture of the local food support system  **One hour**  In small groups of 5/6 participants | **Facilitators** are responsible for facilitating the group discussions and for Rich Picture creation i.e. getting it all down on paper, plus to take some notes of the discussions where possible (headline points/observations).  **Facilitators:**   - **First stage:**   - Ask each member of the group in turn, to say their name, the name and primary focus of their organisation (ideally in one sentence).   - Ask the group what support is available at a local level to help people in food poverty - each member of the group to think about/say 2-3 things and share with others (go round the group). - **Second stage:** Group discussion on everyone’s thoughts on the first stage. - **Third stage:** Participants to represent their thoughts on a sheet of paper through drawing and/or writing: e.g. pictures, text, symbols, cartoons, sketches - **The second and third stages may be done together** (e.g. participants may wish to begin discussing everyone’s thoughts (2nd stage), and shortly move on to begin drawing/writing the Rich Picture - while continuing to discuss.   **Remind participants of the stages of Rich Picture creation (refer to an example (e.g. the above ones)**   - A way of representing things in a complex, messy situation. - Pictures, symbols, cartoons, sketches, keywords or text also (but keep brief). - Disagreement is fine – represent both sides of the disagreement. - Don’t think too much about links/relationships/placement of text/drawings at this stage (activity 2). - Remind participants of the focus on ‘mapping out’ all of the responses to food poverty in xxx that they know of.   **Facilitators:**   - Encourage participants to think of a wide range of responses – from their experience and knowledge, for example: organisations (food banks/assets); beneficiaries; local authorities (and services); charities; community organisations; advice services, schools; partnerships; networks; food supply and distribution; welfare services, local and national policy, etc. - Remind participants that artistic ability is not needed; there are no ‘wrong’ answers; to place the text/symbols/drawings where instinct leads.   **Giorgia:** To alert the room (or facilitators) when there is 10 minutes left to the activity.  **Facilitators:** When there is 10 minutes left to the activity, the facilitator asks participants if anyone wants to say why they have added which component, and if anything needs clarification or if anyone would like to add anything else.  **Facilitators:** To ask the group to nominate someone to present their Rich Pictures to the room (others can chip in).  **Giorgia:** Announce when there is five minutes left and make sure that the activity ends on time, and the break can then start. |
| **Coffee break**  **15 minutes** |  |
| **Activity 1 feedback and Activity 2 introduction**  **20 minutes** | **Chair: “**Shall we have a quick catch up about what we came up with in each group. Can one person from each group briefly present their Rich Pictures to the room, or highlight key aspects of them?” (Other people from the group can chip in).   - Time for group feedback: 3 minutes per group.   **Chair: “**We are now going to go back into our groups to think about how the different types of support available to people in food poverty we have been discussing might be related to each other. We will have 45 minutes to do this activity, and we will have a 20 minute feedback/closing session at the end, after which there will be lunch!  In activity 2 we will be looking at links and relationships between the services and organisations in our rich picture. So this could be direct links between organisations, such as for referrals or getting food in bulk from each other, or it could be broader partnership working and collaboration.  **Chair:** “The **first stage** to this activity is to look at the Rich Pictures in our groups and to discuss links and relationships between the organisations and services supporting people in food poverty.   - To start, think about   - How does your organisation work with other organisations?   - Are there any broader networks that you/your organisation is part of? - The **second stage** is to represent these links on the Rich Picture maps (or separate sheets), by arrows, lines, other drawings and/or text. - The **third stage** is to discuss what you think are the strongest links/partnerships and mark these on your maps? What are the weakest links here? Can you highlight any challenges that organisations face in working in partnership with other organisations and services? - You could consider food support programmes, organisations and networks, food supply chains, funding, service users, as well as broader issues such as the level of food poverty in Bradford.   **Chair:**  Put everyone back into the same groups. Remind everyone of the timing – 45 minutes, followed by a 20 minute feedback/closing session (one or two people to present from each group). |
| **Activity 2**  Exploring links and relationships in local food support systems: Rich Picture links  **45 minutes** | **Facilitators:** Explain that the group will now think about links and relationships between organisations and services supporting people in food poverty in Bradford, using the Rich Picture you made in the last session as a basis for the discussion.  Facilitators can present the groups with extra sheets of paper if needed to work alongside the RPs from activity one.  Move on to check everyone is clear about the key stages of the activity, and that it should be based on the Rich Pictures in the first activity, along with participants’ knowledge and experiences.  **Key stages:**   - **First stage:** *Ask participants in turn, any brief thoughts on the guiding questions:*    - How does your organisation work with other organisations?   - Are there any broader networks that you/your organisation is part of? - The **second stage** is to represent these links on the Rich Picture maps (or separate sheets), by arrows, lines, other drawings and/or text. - The **third stage** is to discuss:   - What do you think are the strongest links/partnerships and mark these on your maps?   - What are the weakest links?   - Can you highlight any challenges that organisations face in working in partnership with other organisations and services? - You could consider food support programmes, organisations and networks, food supply chains, funding, beneficiaries, as well as broader issues such as the level of food poverty in xxx. - The first and second stages may be done together if easier for participants. E.g., participants discuss everyone’s thoughts (after going round the group), and start to draw/write on the Rich Picture (or a separate sheet), while continuing to discuss.   **Giorgia:** Alert the room/facilitators when there is 10 minutes left.  **Facilitators:** Let the group know when there is 10 minutes left, and ask the participants if anyone has anything to clarify or change.  **Facilitators:** Ask the groups to nominate someone to present to the wider room (others can chip in).  **Giorgia:** Inform everyone when there is five minutes left, and make sure that the activity ends on time, and the feedback/closing session starts. |
| **Closing (feedback) session and next steps**  **20 minutes**  Led by chair | **Chair (Activity 2 feedback):**   - “Shall we feedback on the second activity? Can one person from each group briefly present their work/maps to the room? Other people from the group can chip in.” - Feedback timing: 3 minutes per group. - “We have now developed our own maps of responses to food poverty in xxx. These will be combined with the ones we develop in other workshops (explain what these are) to produce one overall map.”   **Chair (final workshop question):**   - **“**Before we finish, we would like to ask you one final question. Individually, please can you write on the Post-it notes on your table and pop your post it note on the wall your brief thoughts on the following question: - *What is the one thing you would do to end food poverty in xxx?* - *We will gather these up and they will inform our work going forward, you can also talk about your answer with colleagues here over lunch.*   **Chair (Next steps):**   - Finish by thanking participants for their time, and explain that a follow up email will be sent to all participants. - Note that we are also holding workshops with food support beneficiaries/recipients, and that we are recruiting for them, with flyers available that participants may wish to take away with them to their organisations. - Note that we have also carried out a survey of food support organisations/assets in Bradford and Tower Hamlets. - Mention further stages/years of the research if needed. - Enjoy lunch! |
| **End and lunch** |  |
