# Supplementary material for: Mapping Local Community Food Organisation Systems: Exploring Organisational Relationships and Key Dependencies
Source: Research Square preprint supplement (doi:10.21203/rs.3.rs-8231779/v1), 2025-12-22
Supplement: Supplementary file 3 [file c828930f694584d9ccc86a74.docx]

Mapping help with food in the community

Thank you for choosing to help us with our survey. Your help is key to understanding what support with food is available in your community. The questions will take between 5 and 10 minutes to answer.

Taking part in this study is voluntary and you are free to withdraw from the study at any time without giving a reason. Once you have submitted the survey, the data collected from your answers may still be used in the research unless you ask the researcher to delete them within two weeks of submission.
Unless you request otherwise, all information you provide in this survey will be pseudonymised: all names of people, organisations and places will be changed and not identifiable. Any information you provide, including personal data, will be kept confidential and stored securely at the University of York. Your data will be handled in accordance with the Data Protection Act (2018) and General Data Protection Regulation at all times. Data collected for this study may be reviewed by people who are responsible for auditing research studies (such as the University of York ethics committee). For more information on how the University of York manages research data visit: <https://www.york.ac.uk/records-management/dp/guidance/gdprcompliantresearch>.

By clicking on next, you confirm that you read the above information and you agree that your data will be used as we described above.

**Are you happy to continue with this survey?**

Yes

No

**P.2**

**1) What is the name of your organisation? (we will not make this information public unless you request it)**__________________________________________

**2) What is your role in this organisation (employed coordinator, volunteer cook…)?**_________________________________________________________

**3) Is your job at the organisation paid?**

- Yes
- No
- Other, please explain_____________________________________________

**4) What area are you based in? (Please note we are only exploring help with food in Bradford and/or Tower Hamlets (London), UK**

- Bradford - please add your postcode________________________
- Tower Hamlets - please add your postcode___________________

**5) Please tick which of the following food services your organisation provides. Select all options that apply to you**

- We run a foodbank
- We run a community cafe or canteen
- We run a social or community supermarket
- We run a food pantry service
- We host a community garden/allotment
- We provide food parcels to the ones in need
- Other - please explain _______________________

**6) Is your organisation affiliated or linked to any wider religious, cultural or political institution or network? Select all the options that apply to you.**

- Church of England
- Council of Mosques
- Anti-Waste food campaigns
- Union or political party
- No affiliation
- Other - please explain
- Prefer not to say

**7) What are the 3 main aims of your organisations? Please put them in order from 1 (most important) to 3 (Least important). Move the rows around to the aims in the right order.**

- End poverty
- Prevent hunger
- Stop food waste
- Stop climate change
- Putting religious faith and principles into practice
- Education
- Other, please explain

**P3**

**8) What food do you offer?**

- Hot/cold cooked meals
- Non-perishable food (e.g. UHT milk, pasta, tins)
- Fresh meat
- Fresh dairy (milk and cheese)
- Fresh eggs
- Fruit and vegetables
- Other, please explain _____________________

**9) Does your organisation provide any of the following options? Select all that apply to you**

- Halal options
- Kosher options
- Allergies/food intolerance alternatives (e.g. gluten-free pasta)
- Vegetarian options
- Vegan options
- None of the above
- Other, please explain_______________________________________________

**10) How do people get the food support you offer? Select all the options that apply to you**

- They come to our venue to collect the food already packed
- They come to our venue to select the food
- We deliver food to their home
- People come to eat at our venue
- We provide food through schools
- Other, please specify________________

**11) How much do people pay for the food? Select all the options that apply to you**

- Nothing, it is all free
- They make a donation (e.g. Pay As You Feel)
- It has a limited fixed cost - please explain________________________________
- Monthly subscription, please explain_________________________________
- Other - please explain_____________________________________________
- Prefer not to answer

**12) What other services do you offer in addition to help with food? Please select all the options that apply to you**

- None
- Cooking lessons
- Help with claiming benefits
- Debt advice
- Credit for energy bills payment
- General advice and signposting
- Pastoral support
- Advice on employment opportunities
- Mental health and wellbeing support
- Other - please specify_____________

**13) Think of service you offer as it is now, with the staff and the resources you have available.**  **In your view, how easy is it to use/access by someone who can’t speak or understand English? 1-5 scale (not at all - very easy (e.g. we speak/have signs in many different languages)**

14) Please add any comments - for example: if you had more resources how would you overcome language barriers?

15) **Think of service you offer as it is now, with the staff and the resources you have available.** How easy is to use/access by someone with mobility issues 1-5 (fully accessible - very hard e.g steps to get in and small toilet)

16) Please add any comments - for example: if you had more resources how would you make your service more accessible to people with mobility issues?

**17) Think of service you offer as it is now, with the staff and the resources you have available.**How easy is to use/access by someone with sensorial disabilities (e.g. blind or deaf people) 1-5 ______________________

**18) Please add here any comments or thoughts about the last question above - - for example: if you had more resources how would you make your service more accessible to people with sensory disabilities?**

**19) Think of service you offer as it is now, with the staff and the resources you have available.**How able is the service to respond to the needs of people from different cultural backgrounds (e.g. avoiding food that is not allowed, provide washing facilities) 1-5 _________________________________________

**20) Please add here any comments or thoughts about the last question above - for example: if you had more resources, what would you do to make your service as inclusive as possible?**

**21) How often do you provide the service/services? Select all the options that apply to you**

- every 3 months or less often
- once a month
- once every two weeks
- once a week
- 2-3 times a week
- 4-6 times a week
- every day
- Other, please explain

**P.5**

**22) Who can access the food you provide?**

- everyone, with no limitations
- everyone who is living in a certain area
- only families of children who come here to learn (school/gym/sport society)
- only people with a referral can access the food
- only people who can pay
- OTHER - please explain

**23) How do people know about your service? (select all the options that apply)**

- word of mouth
- social media
- referral (eg signposted by a GP)
- posters or leaflets
- OTHER - please explain

**24) Which of the following access the food service / services that you offer? (select all the options that apply)**

- Families with young children (0-11)
- Families with older children (12-18)
- Refugees or asylum seekers
- Older people/in receipt of a pension
- People from minority-ethnic groups
- People with disabilities
- People with mental health issues
- People without a permanent home
- Single adults
- Adult couples
- Other, please explain

**25) Approximately how many different households use your service in a month? - Please write a number below. If you have any comments, you can add them next to the number.**

________________________________________________________________

**P.6**

**26) Where do you get the food you donate from?**

- We buy it
- People donate the food to us directly
- We get the food for free from retailers (e.g. supermarkets, grocery, local markets) and the food is still in date
- We get free food from retailers that would otherwise go to waste (i.e. out of date)
- We get it from food redistribution organisations e.g. FareShare
- We get it from food manufacturers
- Other organisations - please explain

**27) What is your organisation dependent on in order to operate? Please select all options that apply**

- Local council funding
- National funding - (e.g. Lottery)
- Private donations of food or money
- Food donations from other organisations (e.g. schools, churches, departments)
- OTHER - please specify
- Prefer not to say

**28) Which other organisations/agencies/institutions do you work with?**

- Local authority
- Local or National Charities
- Places of worships (e.g. temples, mosques, churches)
- Schools/Nurseries
- Children centres
- Health Services
- Supermarkets and food retailers
- None
- OTHER - please explain....................

**29) What other organisations providing food support in the community would you recommend that we talk to?**

________________________________

**30) Would you like to make the name of your organisation public?**

- No, I would rather not
- Yes, please make the name my organisation public

**25) Would you like to take part in a free workshop to help us to understand food provision in the community (Autumn 2023)? At the workshop you will be able to meet other organisations and exchange experiences about providing support with food.**

- Yes (please provide preferred contact and/or contact details)
- No

Thank you for completing our survey! For any questions or to request that we remove you from our list, please contact Giorgia at [giorgia.previdoli@york.ac.uk](mailto:giorgia.previdoli@york.ac.uk). or 07385538788.
