# Supplementary material for: Mapping Local Community Food Organisation Systems: Exploring Organisational Relationships and Key Dependencies
Source: Research Square preprint supplement (doi:10.21203/rs.3.rs-8231779/v1), 2025-12-22
Supplement: Supplementary file 4 [file dcf7da5c807be60c174824d0.docx]

| **Fair Food Futures UK** | |
| --- | --- |
| **Members of the public workshop plan** | |
| **Topic** | Services and organisations providing support with food and beyond in Bradford / TH - how do people know about them, problems in getting access, what works, what doesn’t, what else people find there, in addition to food. |
| **Output** | Food support system maps for Bradford or Tower Hamlets |
| **Roles** | Host to lead session and assign breakout groups  One facilitator per group (aid discussions/activities).  Host to keep a note of timings/alert facilitators/record whole group feedback session |
| **Total session time** | 120 minutes / 2 hours (including breaks) |
| **Resources** | Workshop consent form and information sheet  Plain summary of our study  Animation introduction to the study, if ready.  Materials:  Flipchart paper, pens, markers, sticky note white tack  consent forms, information sheets, registration list, vouchers |
| **Timing** | **Actions** |
| **Welcome and Fair Food Futures UK research introduction**  **10 minutes** | **Host:** (example script)   - Thank you all for joining us today. This is an informal chat, we are here today to learn more about what support with food and beyond people can find around Bradford. - My name is xxx and I am very happy and grateful to welcome you all here at this beautiful venue in Bradford. We are also joined by xxx, who will help me when we split out in small groups, so we all get a chance to share our thoughts and ideas. - About this project   First just a very quick summary of what this is all about. Today’s chat and lunch is part of Fair Food Futures UK, a research project based in Bradford and London that wants to understand what roles organisations like food banks and community cafes play in people’s life in the UK**.**  We want to find out what types of support families find most helpful and issues they may experience in getting help.  We are also interested in the ways organisations offering help with food also provide other types of support beyond food, for instance with benefits and bills. We want to understand how this wider support can help families to be in a better place, where food from food banks and similar organisations is no longer needed. |
| **Today’s plan, consent and shared rules**  **15 minutes**  Led by chair | **Host presents the plan for the day**  (example script)  **Questions**  We have a few questions we would like to ask you. There are no right or wrong answers. We are here to listen.  Here are the questions   1. How do people find out about help with food in the community around xxx?   (follow up) What organisations/services are you aware of?   1. What issues or problems might people experience in getting help with food? 2. What other support, in addition to food, do people use? (e.g. help with benefits, bills and other advice from food banks, cash/money support from the council/food banks). 3. What works well/what makes a difference? Why/how? 4. What could make things better?     **Plan:**   - We will work in 3 small groups, so everyone gets a chance to talk. One or two of us will be sitting at each table. - You don’t have to talk about personal experiences, you can talk about what people around you told you. You can share as much or as little as you like. - You can talk, you can write or you can draw. We encourage everyone to put their thoughts and answers down on the big pieces of paper on the table using markers, pens and sticky note. You don’t need to be an artist to draw your answers. Sticky men and women and messy lines are perfectly fine. Sometimes putting things down on paper feels easier and works better than talking about it. - We have our lunch together from 12:30 to 1:00/ Before that we will briefly sit all together and we can share our thoughts with the big group, if we want to. The facilitators will briefly sum up interesting things coming out of discussion, but will not talk about any personal experience shared by the group. - Before you leave, we sort out the vouchers.   **Consent**   - Because this is a research project, before we start our activity we need to make sure that everyone is happy about taking part. After looking at the information sheet you received, can you please sign the consent form? Thanks a lot.   If you have any questions I am here to answer.   - Before we start we want to ask your permission to record what people say around the tables. This is just to help us with notes, so we don’t miss important things people say. The recordings will be deleted after we type them and all names and personal details will be deleted or changed, so nobody can be identified.   Is that fine for everyone? Have you got any questions?  **Common rules**  Before we start, these are some rules we like to follow when we work in small groups, like today. Please tell us if you think that they can work for us today or if you want to add anything.   1. Be kind – it’s important that we work together in a way that is non-judgemental, encouraging and supportive 2. Remember we’re all coming from different places and experiences 3. Be respectful of each other and each other’s differences 4. Share the space - listen and let others speak 5. To respect people’s confidentiality what is said in the room (personal experiences and information) stays in the room 6. Facilitators may stop people from time to time 7. Only share what we feel comfortable sharing   **Chair:** To allocate groups of 5/6 participants (depending on overall workshop size). |
| **Group Discussion**  In small groups of 5/7 participants | **Facilitators** are responsible for facilitating the group discussions and encourage people to use markers, sticky and paper to put down their thoughts and answers, as well as discussion.  **Ice breaking:**   - Ask each member of the group in turn, to say their name and how they travelled to the event.   **Facilitators let people know that the recording is about to start and check again that people are happy with that.**  **Questions for discussion**   - **Questions 1**   How do people find out about help with food in the community around xxx? (follow up) What organisations/services providing support with food are you aware of? - write them or draw them down on the paper   - **Questions 2**   What issues or problems might people experience in getting help with food?   - **Question 3**   What other support, in addition to food, do people use? (e.g. help with benefits, bills and other advice from food banks, cash/money support from the council/food banks).   - **Question 4**   What works well/what makes a difference to people? Why/how?   - **Question 5**   What could be improved?  **Facilitators:**   - Present questions one at times, ask the group if they have any thoughts or ideas they want to share. - Remind that if they prefer not to talk they can start putting their thoughts down on the paper. - Encourage participants to think of a wide range of responses – from their own experience and knowledge or from people around them. - Remind participants that artistic ability is not needed; there are no ‘wrong’ answers; to place the text/symbols/drawings where instinct leads. - After a quick round of answers, facilitators moves to the next questions - Explain that when all come back all together, facilitators will give a very short summary of interesting general points that came out but no personal experience shared will be mentioned.   **Host:** To alert the room (or facilitators) ten and five minutes before the end.  **Facilitators:** When there is 10 minutes left to the activity, the facilitator asks participants if anyone wants to say something about what they have drawn or written on the big sheet of paper, and if anything needs clarification or if anyone would like to add anything else.  **Host:** Announce when there is five minutes left and make sure that the activity ends on time. |
| **Closing session and next steps**  **10 minutes**  Led by host | **Host (Thank you and closure):**   - Facilitators may want to give a very brief summary focused in general on how people access food support, the challenges and what works well NOT mention any personal experience or example shared. - Facilitators can check if anyone in their group wants to add anything - Host thanks participants for their time and for sharing their knowledge - Host mentions previous of farther stages of the research - Host reminds participants that they can receive study updates and reports if they want to, they just need to let Ria know, before leaving. - Enjoy lunch! |
| **End and lunch** |  |
