# Supplementary material for: Mapping Local Community Food Organisation Systems: Exploring Organisational Relationships and Key Dependencies
Source: Research Square preprint supplement (doi:10.21203/rs.3.rs-8231779/v1), 2025-12-22
Supplement: Supplementary file 5 [file ee728fd99b77b114ff69c61e.docx]

**Interview schedule for CFO representatives (WP1)**

1. **Background information**: location, services provided, opening hours, when organisation/service was set up, number of staff, number of volunteers, funders, food suppliers.
2. **Aims and logic model/theory of change**:

What are the aims of your organisation/service?

[How does your organisation aim to tackle / prevent food poverty, or poverty more broadly?]

Have your aims and what you do changed in recent years?

Are you planning to make changes? If so, how?

1. **Partnerships and networks:**
2. What are the key organisations you are dependent on in order to operate (locally, regionally, nationally)? And how? (e.g. highly influential/couldn’t operate without)
3. Are there any other organisations that you partner with that are beneficial but not essential to your operations? How?
4. Within Bradford / TH can you think of other organisations/services/ people that are essential for allowing people to access the food they need?
5. What are the challenges and opportunities of working in partnership with organisations/services or people?
6. Are you part of a wider network or do you work independently?
7. Are you involved in campaigning at a local, regional or national level?
8. **Target group/s**:

[How] have the needs of your target groups changed over the last few years?

Who might be food insecure but is not accessing your services?

Do you aim to reach these groups? - if so, how?

What barriers are you aware of?

1. **Information and managing access:**

How do people find out about your organisation/service(s)?

How can people access your service(s)?

Is your service open to all, or have you put criteria in place?

1. **Supporting service users:**

How do you identify any underlying needs of people accessing your services?

How do you provide the support they need?

What do you do when you identify needs you can’t address?

1. **Access to other services**:

(How) do you know if your service users are also accessing other community food aid organisations, or non-food support services?

Do you feel these are complementary services?

1. **Impact and effectiveness**

What data (if any) do you collect from service users?

What kinds of impact do you measure?

How effective do you believe your service/organisation is in achieving its aims?

To what extent do you believe your service/organisation reduces the need for emergency food? (How?)

What would you say works well?

Who do you share these data with?

Do you evaluate or monitor the impact of your network? (How?)

1. **Challenges:** What are your biggest challenges as a service/organisation providing food assistance and/or other kinds of support?
2. **What needs to change:** What do you feel needs to change locally/regionally/nationally to address the issues underlying food insecurity?
3. **And finally:** Is there anything else you would like to share with me?

Thank you! [explain next steps of the research study, how/when findings will be shared]
